# Supplementary material for: Genetic Basis for Variation of Metalloproteinase-Associated Biochemical Activity in Venom of the Mojave Rattlesnake (Crotalus scutulatus scutulatus)
Source: Hindawi journal article supplement (doi:10.1155/2013/251474), 2013-01-01
Supplement: f1 [file 251474.f1.pdf]

Supplementary Figure 1

1 65  
\* ↓“Cysteine Switch” sequence (PKMCGVT) \*

Css28 GGCCCCAAAATGTGTGGGGTAACCAGACTACTTGGGAATCAGATGAGCCCATCAAAAAGCTTCTC  
Css31 GGCCCCAAAATGTGTGGGGTAACCAGACTACTTGGGAATCAGATGAGCCCATCAAAAAGCTTCTC  
Css36 GGCCCCAAAATGTGTGGGGTAACCAGACTACTTGGGAATCAGATGAGCCCATCAAAAAGCTTCTC  
Css61 GCCCCCCAAAATGTGTGGGGTAACCAGACTACTTGGGAATCATATGAGCCCATCAAAAAGCTTCTC  
Css62 GCCCCCCAAAATGTGTGGGGTAACCAGACTACTTGGGAATCATATGAGCCCATCAAAAAGCTTCTC  
Css64 GCCCCCCAAAATGTGTGGGGTAACCAGACTACTTGGGAATCATATGAGCCCATCAAAAAGCTTCTC  
Css65 GCCCCCCAAAATGTGTGGGGTAACCAGACTACTTGGGAATCAGATGAGCCCATCAAAAAGCTTCTC  
Css66 GCCCCCCAAAATGTGTGGGGTAACCAGACTACTTGGGAATCAGATGAGCCCATCAAAAAGCTTCTC  
Css67 GCCCCCCAAAATGTGTGGGGTAACCAGACTACTTGGGAATCAGATGAGCCCATCAAAAAGCTTCTC  
Css68 GGCCCCAAAATGTGTGGGGTAACCAGACTACTTGGGAATCAGATGAGCCCATCAAAAAGCTTCTC  
Css69 GCCCCCCAAAATGTGTGGGGTAACCAGACTACTTGGGAATCAGATGAGCCCATCAAAAAGCTTCTC  
Css71 GCCCCCCAAAATGTGTGGGGTAACCAGACTACTTGGGAATCAAATGAGCCCATCAAAAAGCTTCTC  
Css74 GCCCCCCAAAATGTGTGGGGTAACCAGACTACTTGGGAATCAAATGAGCCCATCAAAAAGCTTCTC  
Css75 GCCCCCCAAAATGTGTGGGGTAACCAGACTACTTGGGAATCAGATGAGCCCATCAAAAAGCTTCTC

66 130  
\* \* \* \* \* \*\* \* \*

Css28 AATTAATTGTTACTCCTGAACAACAAACATACTTGGATGCCAAAAAATACGAAATGGTCAGGAAA  
Css31 AATTAATTGTTACTCCTGAACAACAAACATACTTGGATGCCAAAAAATACGAAATGGTCAGGAAA  
Css36 AATTAATTGTTACTCCTGAACAACAAACATACTTGGATGCCAAAAAATACGAAATGGTCAGGAAA  
Css61 ATTTAATTCTTAATCCTGACCAACAAAGATACTTGGATGCCAAAAAATACGAAATGTTTCATGAAA  
Css62 ATTTAATTCTTAATCCTGACCAACAAAGATACTTGGATGCCAAAAAATACGAAATGTTTCATGAAA  
Css64 ATTTAATTCTTAATCCTGACCAACAAAGATACTTGGATGCCAAAAAATACGAAATGTTTCATGAAA  
Css65 AGTTAATTGTTACTCCTGAACAACAAACATACTTGGATGCCAAAAAATACGAAATGGTCAGGAAA  
Css66 AGTTAATTGTTACTCCTGAACAACAAACATACTTGGATGCCAAAAAATACGAAATGGTCAGGAAA  
Css67 AGTTAATTGTTACTCCTGAACAACAAACATACTTGGATGCCAAAAAATACGAAATGGTCAGGAAA  
Css68 AATTAATTGTTACTCCTGAACAACAAACATACTTGGATGCCAAAAAATACGAAATGGTCAGGAAA  
Css69 AGTTAATTGTTACTCCTGAACAACAAACATACTTGGATGCCAAAAAATACGAAATGGTCAGGAAA  
Css71 AGTTAATTGTTACTCCTGAACAACAAACATACTTGGATGCCAAAAAATACGAAATGGTCAGGAAA  
Css74 AGTTAATTGTTACTCCTGAACAACAAACATACTTGGATGCCAAAAAATACGAAATGGTCAGGAAA  
Css75 AGTTAATTGTTACTCCTGAACAACAAACATACTTGGATGCCAAAAAATACGAAATGGTCAGGAAA

↑ N-terminal region of mature protein (de Araujo and Ownby, 1995)

131 195  
\*\* \*\* \* \* \* \*

Css28 TACAATGACAGTTTAACTGCTATAAGAACAAGGGCATATGAAATTGTCAACACTTTAAATGAGAT  
Css31 TACAATGACAGTTTAACTGCTATAAGAACAAGGGCATATGAAATTGTCAACACTTTAAATGAGAT  
Css36 TACAATGACAGTTTAACTGCTATAAGAACAAGGGCATATGAAATTGTCAACACTTTAAATGAGAT  
Css61 TACAATGACAGTTTAACTGCTATAAGAACAAGGGCATATGAAATTGTCAACACTTTAAATGAGAT  
Css62 TACAATGACAGTTTAACTGCTATAAGAACAAGGGCATATGAAATTGTCAACACTTTAAATGAGAT  
Css64 TACAATGACAGTTTAACTGCTATAAGAACAAGGGCATATGAAATTGTCAACACTTTAAATGAGAT  
Css65 TACAATGACAGTTTAACTGCTATAAGAACAAGGGCATATGAAATTGTCAACACTTTAAATGAGAT  
Css66 TACAATGACAGTTTAACTGCTATAAGAACAAGGGCATATGAAATTGTCAACACTTTAAATGAGAT  
Css67 TACAATGACAGTTTAACTGCTATAAGAACAAGGGCATATGAAATTGTCAACACTTTAAATGAGAT  
Css68 TACAATGACAGTTTAACTGCTATAAGAACAAGGGCATATGAAATTGTCAACACTTTAAATGAGAT  
Css69 TACAATGACAGTTTAACTGCTATAAGAACAAGGGCATATGAAATTGTCAACACTTTAAATGAGAT  
Css71 TACAATGACAGTTTAACTGCTATAAGAACAAGGGCATATGAAATTGTCAACACTTTAAATGAGAT  
Css74 TACAATGACAGTTTAACTGCTATAAGAACAAGGGCATATGAAATTGTCAACACTTTAAATGAGAT  
Css75 TACAATGACAGTTTAACTGCTATAAGAACAAGGGCATATGAAATTGTCAACACTTTAAATGAGAT

196 \*\* \*\* \* 260

Css28 TTCAATATTCGTGTACCATTCACTGGCCTACAAATTTGGTCCAATAGAGATTTCAATTAATGTGC  
 Css31 TTCAATATTCGTGTACCATTCACTGGCCTACAAATTTGGTCCAATAGAGATTTCAATTAATGTGC  
 Css36 TTCAATATTCGTGTACCATTCACTGGCCTACAAATTTGGTCCAATAGAGATTTCAATTAATGTGC  
 Css61 TTCAATATTGATGTCTCATTCACTGGCCTACAAATTTGGTCCAATACAGATTTCAATTAATGTGC  
 Css62 TTCAATATTGATGTCTCATTCACTGGCCTACAAATTTGGTCCAATACAGATTTCAATTAATGTGC  
 Css64 TTCAATATTGATGTCTCATTCACTGGCCTACAAATTTGGTCCAATACAGATTTCAATTAATGTGC  
 Css65 TTCAATATTCGTGTACCATTCACTGGCCTACAAATTTGGTCCAATAGAGATTTCAATTAATGTGC  
 Css66 TTCAATATTCGTGTACCATTCACTGGCCTACAAATTTGGTCCAATAGAGATTTCAATTAATGTGC  
 Css67 TTCAATATTCGTGTACCATTCACTGGCCTACAAATTTGGTCCAATAGAGATTTCAATTAATGTGC  
 Css68 TTCAATATTCGTGTACCATTCACTGGCCTACAAATTTGGTCCAATAGAGATTTCAATTAATGTGC  
 Css69 TTCAATATTCGTGTACCATTCACTGGCCTACAAATTTGGTCCAATAGAGATTTCAATTAATGTGC  
 Css71 TTCAATATTCGTGTACCATTCACTGGCCTACAAATTTGGTCCAATAGAGATTTCAATTAATGTGC  
 Css74 TTCAATATTCGTGTACCATTCACTGGCCTACAAATTTGGTCCAATAGAGATTTCAATTAATGTGC  
 Css75 TTCAATATTCGTGTACCATTCACTGGCCTACAAATTTGGTCCAATAGAGATTTCAATTAATGTGC

261 \* \* 325

Css28 AGTCAGCAGTAACTGTTACTTTGGACTTATTTGGAGAATGGAGAGAAGACAGTCTTGTTGAATCG  
 Css31 AGTCAGCAGTAACTGTTACTTTGGACTTATTTGGAGAATGGAGAGAAGACAGTCTTGTTGAATCG  
 Css36 AGTCAGCAGTAACTGTTACTTTGGACTTATTTGGAGAATGGAGAGAAGACAGTCTTGTTGAATCG  
 Css61 AGTCAGTAGTAAATGTTACTTTGGACTTATTTGGAGAATGGAGAGAAGACAGTCTTGTTGAATCG  
 Css62 AGTCAGTAGTAAATGTTACTTTGGACTTATTTGGAGAATGGAGAGAAGACAGTCTTGTTGAATCG  
 Css64 AGTCAGTAGTAAATGTTACTTTGGACTTATTTGGAGAATGGAGAGAAGACAGTCTTGTTGAATCG  
 Css65 AGTCAGTAGTAACTGTTACTTTGGACTTATTTGGAGAATGGAGAGAAGAAAGTCTTGTTGAATCG  
 Css66 AGTCAGTAGTAACTGTTACTTTGGACTTATTTGGAGAATGGAGAGAAGAAAGTCTTGTTGAATCG  
 Css67 AGTCAGTAGTAACTGTTACTTTGGACTTATTTGGAGAATGGAGAGAAGAAAGTCTTGTTGAATCG  
 Css68 AGTCAGCAGTAACTGTTACTTTGGACTTATTTGGAGAATGGAGAGAAGACAGTCTTGTTGAATCG  
 Css69 AGTCAGTAGTAACTGTTACTTTGGACTTATTTGGAGAATGGAGAGAAGAAAGTCTTGTTGAATCG  
 Css71 AGTCAGTAGTAACTGTTACTTTGGACTTATTTGGAGAATGGAGAGAAGAAAGTCTTGTTGAATCG  
 Css74 AGTCAGTAGTAACTGTTACTTTGGACTTATTTGGAGAATGGAGAGAAGAAAGTCTTGTTGAATCG  
 Css75 AGTCAGTAGTAACTGTTACTTTGGACTTATTTGGAGAATGGAGAGAAGAAAGTCTTGTTGAATCG

326 \*\* \* \*\*\*\*\* \*\* \* \* 390

Css28 CAGAAGGCAGGATACTGGCTCAGTACTCACGGTGGAT-----G--AAACTATACGATTG  
 Css31 CAGAAGGCAGGATACTGGCTCAGTACTCACGGTGGAT-----G--AAACTATACGATTG  
 Css36 CAGAAGGCAGGATACTGGCTCAGTACTCACGGTGGAT-----G--AAACTATACGATTG  
 Css61 CAGAAGGCAGGATACTGCGTCAGTCACTCACGGTGGATAACTTTGGAGGAAAAACTATAACGATT  
 Css62 CAGAAGGCAGGATACTGCGTCAGTCACTCACGGTGGATAACTTTGGAGGAAAAACTATAACGATT  
 Css64 CAGAAGGCAGGATACTGCGTCAGTCACTCACGGTGGATAACTTTGGAGGAAAAACTATAACGATT  
 Css65 CAGAAGGCAGGATACTGGCTCAGTACTCACGGTGGAT-----G--AAACTATACGATTG  
 Css66 CAGAAGGCAGGATACTGGCTCAGTACTCACGGTGGAT-----G--AAACTATACGATTG  
 Css67 CAGAAGGCAGGATACTGGCTCAGTACTCACGGTGGAT-----G--AAACTATACGATTG  
 Css68 CAGAAGGCAGGATACTGGCTCAGTACTCACGGTGGAT-----G--AAACTATACGATTG  
 Css69 CAGAAGGCAGGATACTGGCTCAGTACTCACGGTGGAT-----G--AAACTATACGATTG  
 Css71 CAGAAGGCAGGATACTGGCTCAGTACTCACGGTGGAT-----G--AAACTATACGATTG  
 Css74 CAGAAGGCAGGATACTGGCTCAGTACTCACGGTGGAT-----G--AAACTATACGATTG  
 Css75 CAGAAGGCAGGATACTGGCTCAGTACTCACGGTGGAT-----G--AAACTATACGATTG

391 \* \* \* \* \*\* \* \* \* \* \* 455

Css28 GGCAGCATGTGCCACCCGAAGCTTTCTGCAGGAATTGTTTCAGGTTTCATAGCACATTACATTTATT



Css67 CAA-TTTCAACTTCTCGC-----GGGA  
 Css68 CAA-TTTCAACTTCTCGC-----GGGT-GGA  
 Css69 CAA-TTTCAACTTCTCGC-----GGGA  
 Css71 CAA-TTTCAACTTCTCGC-----GGGA  
 Css74 CAA-TTTCAACTTCTCGC-----GGGA  
 Css75 CAA-TTTCAACTTCTCGC-----GGGA

695 776  
 \*\*\*\* \* \*\* \*  
 C s s 2 8 ---GAAAGATCTCACAAAGTTGGAATTGAGTGATTGAAATTTTAGTCCCACCCAGGTGCCCGCCACAGCCACCCAATTGGT  
 C s s 3 1 ---GAAAGATCTCACAAAGTTGGAATTGAGTGATTGAAATTTTAGTCCCACCCAGGTGCCCGCCACAGCCACCCAATTGGT  
 C s s 3 6 ---GAAAGATCTCACAAAGTTGGAATTGAGTGATTGAAATTTTAGTCCCACCCAGGTGCCCGCCACAGCCACCCAATTGGT  
 C s s 6 1 AAAAAAGATCTCACAAAGTTGGAATTGAGTGATTGAAATTTTAGTCCCACCCAG-CTGCCGCCACAGCCCCCAATTGGT  
 C s s 6 2 AAAAAAGATCTCACAAAGTTGGAATTGAGTGATTGAAATTTTAGTCCCACCCAG-CTGCCGCCACAGCCCCCAATTGGT  
 C s s 6 4 AAAAAAGATCTCACAAAGTTGGAATTGAGTGATTGAAATTTTAGTCCCACCCAG-CTGCCGCCACAGCCCCCAATTGGT  
 C s s 6 5 AAAAAAGATCTCACAAAGTTGGAATTGAGTGATTGAAATTTTAGTCCCCCAGGCTGCCCCACAGCCACCCAATTGGT  
 C s s 6 6 AAAAAAGATCTCACAAAGTTGGAATTGAGTGATTGAAATTTTAGTCCCCCAGGCTGCCCCACAGCCACCCAATTGGT  
 C s s 6 7 AAAAAAGATCTCACAAAGTTGGAATTGAGTGATTGAAATTTTAGTCCCCCAGGCTGCCCCACAGCCACCCAATTGGT  
 C s s 6 8 ---GAAAGATCTCACAAAGTTGGAATTGAGTGATTGAAATTTTAGTCCCACCCAGGTGCCCGCCACAGCCACCCAATTGGT  
 C s s 6 9 AAAAAAGATCTCACAAAGTTGGAATTGAGTGATTGAAATTTTAGTCCCCCAGGCTGCCCCACAGCCACCCAATTGGT  
 C s s 7 1 AAAAAAGATCTCACAAAGTTGGAATTGAGTGATTGAAATTTTAGTCCCCCAGGCTGCCCCACAGCCACCCAATTGGT  
 C s s 7 4 AAAAAAGATCTCACAAAGTTGGAATTGAGTGATTGAAATTTTAGTCCCCCAGGCTGCCCCACAGCCACCCAATTGGT  
 C s s 7 5 AAAAAAGATCTCACAAAGTTGGAATTGAGTGATTGAAATTTTAGTCCCCCAGGCTGCCCCACAGCCACCCAATTGGT

777 858  
 \* \* \* \* \*  
 C s s 2 8 CACACCCACCC-AATTGGCCAAACCTACCCGA-TGGGCTACGCCTACCTGGTACTCAACGATACATAAGTGGGTTTGGT  
 C s s 3 1 CACACCCACCC-AATTGGCCAAACCTACCCGA-TGGGCTACGCCTACCTGGTACTCAACGATACATAAGTGGGTTTGGT  
 C s s 3 6 CACACCCACCC-AATTGGCCAAACCTACCCGA-TGGGCTACGCCTACCTGGTACTCAACGATACATAAGTGGGTTTGGT  
 C s s 6 1 CAC-CCCCCCAATTGGCCAACCCCCCGAGTGGTACGCCTCTACCTGGTACCCAACGATACATAAGTGGGTTTGGT  
 C s s 6 2 CAC-CCCCCCAATTGGCCAACCCCCCGAGTGGTACGCCTCTACCTGGTACCCAACGATACATAAGTGGGTTTGGT  
 C s s 6 4 CAC-CCCCCCAATTGGCCAACCCCCCGAGTGGTACGCCTCTACCTGGTACCCAACGATACATAAGTGGGTTTGGT  
 C s s 6 5 CACACCCACCC-AATTGGCCAAACCTACCCG-GTGGGCTACACCTACCTGGTACCCAACGATACATAAGTGGGTTTGGT  
 C s s 6 6 CACACCCACCC-AATTGGCCAAACCTACCCG-GTGGGCTACACCTACCTGGTACCCAACGATACATAAGTGGGTTTGGT  
 C s s 6 7 CACACCCACCC-AATTGGCCAAACCTACCCG-GTGGGCTACACCTACCTGGTACCCAACGATACATAAGTGGGTTTGGT  
 C s s 6 8 CACACCCACCC-AATTGGCCAAACCTACCCGA-TGGGCTACGCCTACCTGGTACTCAACGATACATAAGTGGGTTTGGT  
 C s s 6 9 CACACCCACCC-AATTGGCCAAACCTACCCG-GTGGGCTACACCTACCTGGTACCCAACGATACATAAGTGGGTTTGGT  
 C s s 7 1 CACACCCACCC-AATTGGCCAAACCTACCCG-GTGGGCTACACCTACCTGGTACCCAACGATACATAAGTGGGTTTGGT  
 C s s 7 4 CACACCCACCC-AATTGGCCAAACCTACCCG-GTGGGCTACACCTACCTGGTACCCAACGATACATAAGTGGGTTTGGT  
 C s s 7 5 CACACCCACCC-AATTGGCCAAACCTACCCG-GTGGGCTACACCTACCTGGTACCCAACGATACATAAGTGGGTTTGGT

859 933  
 C s s 2 8 GCAGTTTGGGCACTCAGTCTCTAAAAGTTTACCATCACTGGGCAATGAGTGGGTATAATCTGGGCATTAATCA  
 C s s 3 1 GCAGTTTGGGCACTCAGTCTCTAAAAGTTTACCATCACTGGGCAATGAGTGGGTATAATCTGGGCATTAATCA  
 C s s 3 6 GCAGTTTGGGCACTCAGTCTCTAAAAGTTTACCATCACTGGGCAATGAGTGGGTATAATCTGGGCATTAATCA  
 C s s 6 1 GCAGTTTGGGCACTCAGTCTCTAAAAGTTTACCATCACTGGGCAATGAGTGGGTATAATCTGGGCATTAATCA  
 C s s 6 2 GCAGTTTGGGCACTCAGTCTCTAAAAGTTTACCATCACTGGGCAATGAGTGGGTATAATCTGGGCATTAATCA  
 C s s 6 4 GCAGTTTGGGCACTCAGTCTCTAAAAGTTTACCATCACTGGGCAATGAGTGGGTATAATCTGGGCATTAATCA  
 C s s 6 5 GCAGTTTGGGCACTCAGTCTCTAAAAGTTTACCATCACTGGGCAATGAGTGGGTATAATCTGGGCATTAATCA  
 C s s 6 6 GCAGTTTGGGCACTCAGTCTCTAAAAGTTTACCATCACTGGGCAATGAGTGGGTATAATCTGGGCATTAATCA  
 C s s 6 7 GCAGTTTGGGCACTCAGTCTCTAAAAGTTTACCATCACTGGGCAATGAGTGGGTATAATCTGGGCATTAATCA  
 C s s 6 8 GCAGTTTGGGCACTCAGTCTCTAAAAGTTTACCATCACTGGGCAATGAGTGGGTATAATCTGGGCATTAATCA  
 C s s 6 9 GCAGTTTGGGCACTCAGTCTCTAAAAGTTTACCATCACTGGGCAATGAGTGGGTATAATCTGGGCATTAATCA  
 C s s 7 1 GCAGTTTGGGCACTCAGTCTCTAAAAGTTTACCATCACTGGGCAATGAGTGGGTATAATCTGGGCATTAATCA  
 C s s 7 4 GCAGTTTGGGCACTCAGTCTCTAAAAGTTTACCATCACTGGGCAATGAGTGGGTATAATCTGGGCATTAATCA  
 C s s 7 5 GCAGTTTGGGCACTCAGTCTCTAAAAGTTTACCATCACTGGGCAATGAGTGGGTATAATCTGGGCATTAATCA

934 998

Css28 **TGACAGAGATTCTGTACTTGCGGTGCTAACTAATGCATTATGGCTTCTGTTCTAAGTGATCAAT**  
 Css31 **TGACAGAGATTCTGTACTTGCGGTGCTAACTAATGCATTATGGCTTCTGTTCTAAGTGATCAAT**  
 Css36 **TGACAGAGATTCTGTACTTGCGGTGCTAACTAATGCATTATGGCTTCTGTTCTAAGTGATCAAT**  
 Css61 **TGACAGAGATTCTGTACTTGCGGTGCTAACTAATGCATTATGGCTTCTGTTCTAAGTGATCAAT**  
 Css62 **TGACAGAGATTCTGTACTTGCGGTGCTAACTAATGCATTATGGCTTCTGTTCTAAGTGATCAAT**  
 Css64 **TGACAGAGATTCTGTACTTGCGGTGCTAACTAATGCATTATGGCTTCTGTTCTAAGTGATCAAT**  
 Css65 **TGACAGAGATTCTGTACTTGCGGTGCTAACTAATGCATTATGGCTTCTGTTCTAAGTGATCAAT**  
 Css66 **TGACAGAGATTCTGTACTTGCGGTGCTAACTAATGCATTATGGCTTCTGTTCTAAGTGATCAAT**  
 Css67 **TGACAGAGATTCTGTACTTGCGGTGCTAACTAATGCATTATGGCTTCTGTTCTAAGTGATCAAT**  
 Css68 **TGACAGAGATTCTGTACTTGCGGTGCTAACTAATGCATTATGGCTTCTGTTCTAAGTGATCAAT**  
 Css69 **TGACAGAGATTCTGTACTTGCGGTGCTAACTAATGCATTATGGCTTCTGTTCTAAGTGATCAAT**  
 Css71 **TGACAGAGATTCTGTACTTGCGGTGCTAACTAATGCATTATGGCTTCTGTTCTAAGTGATCAAT**  
 Css74 **TGACAGAGATTCTGTACTTGCGGTGCTAACTAATGCATTATGGCTTCTGTTCTAAGTGATCAAT**  
 Css75 **TGACAGAGATTCTGTACTTGCGGTGCTAACTAATGCATTATGGCTTCTGTTCTAAGTGATCAAT**

↑ Zn<sup>2+</sup> - binding motif end

999 1063

\* \* \*

Css28 CTTCCAATTCATTAGCAATTATAGTAAGGTGGAACATAGGAGGTATCTTATTAATCATACCCCA  
 Css31 CTTCCAATTCATTAGCAATTATAGTAAGGTGGAACATAGGAGGTATCTTATTAATCATACCCCA  
 Css36 CTTCCAATTCATTAGCAATTATAGTAAGGTGGAACATAGGAGGTATCTTATTAATCATACCCCA  
 Css61 CTTCCAATTCATTAGCAATTGTAGTAAGGTGGAACATAGGAGGTATCTTATTAATCATACCCCA  
 Css62 CTTCCAATTCATTAGCAATTGTAGTAAGGTGGAACATAGGAGGTATCTTATTAATCATACCCCA  
 Css64 CTTCCAATTCATTAGCAATTGTAGTAAGGTGGAACATAGGAGGTATCTTATTAATCATACCCCA  
 Css65 CTTCCAATTCATTAGCAATTATAGTAAGGTGGAACATAGGAGGTATCTTATTAATCATACCCCA  
 Css66 CTTCCAATTCATTAGCAATTATAGTAAGGTGGAACATAGGAGGTATCTTATTAATCATACCCCA  
 Css67 CTTCCAATTCATTAGCAATTATAGTAAGGTGGAACATAGGAGGTATCTTATTAATCATACCCCA  
 Css68 CTTCCAATTCATTAGCAATTATAGTAAGGTGGAACATAGGAGGTATCTTATTAATCATACCCCA  
 Css69 CTTCCAATTCATTAGCAATTATAGTAAGGTGGAACATAGGAGGTATCTTATTAATCATACCCCA  
 Css71 CTTCCAATTCATTAGCAATTATAGTAAGGTGGAACATAGGAGGTATCTTATTAATCATACCCCA  
 Css74 CTTCCAATTCATTAGCAATTATAGTAAGGTGGAACATAGGAGGTATCTTATTAATCATACCCCA  
 Css75 CTTCCAATTCATTAGCAATTATAGTAAGGTGGAACATAGGAGGTATCTTATTAATCATACCCCA

1064 1128

\* \*

Css28 CAATGCATTCTCAATGAACCCCTGTGCACAGATATTGTTTCCCCTGCAGTTTGTGGAAATGAACT  
 Css31 CAATGCATTCTCAATGAACCCCTGTGCACAGATATTGTTTCCCCTGCAGTTTGTGGAAATGAACT  
 Css36 CAATGCATTCTCAATGAACCCCTGTGCACAGATATTGTTTCCCCTGCAGTTTGTGGAAATGAACT  
 Css61 CAATGCATTCTCAATGAACCCCTGTGCACAGATATTGTTTCCCCTGCAGTTTGTGGAAATGAACT  
 Css62 CAATGCATTCTCAATGAACCCCTGTGCACAGATATTGTTTCCCCTGCAGTTTGTGGAAATGAACT  
 Css64 CAATGCATTCTCAATGAACCCCTGTGCACAGATATTGTTTCCCCTGCAGTTTGTGGAAATGAACT  
 Css65 CAATGCATTCTCAATGAACCCCTGTGCACAGATATTGTTTCCCCTGCAGTTTGTGGAAATGAACT  
 Css66 CAATGCATTCTCAATGAACCCCTGTGCACAGATATTGTTTCCCCTGCAGTTTGTGGAAATGAACT  
 Css67 CAATGCATTCTCAATGAACCCCTGTGCACAGATATTGTTTCCCCTGCAGTTTGTGGAAATGAACT  
 Css68 CAATGCATTCTCAATGAACCCCTGTGCACAGATATTGTTTCCCCTGCAGTTTGTGGAAATGAACT  
 Css69 CAATGCATTCTCAATGAACCCCTGTGCACAGATATTGTTTCCCCTGCAGTTTGTGGAAATGAACT  
 Css71 CAATGCATTCTCAATGAACCCCTGTGCACAGATATTGTTTCCCCTGCAGTTTGTGGAAATGAACT  
 Css74 CAATGCATTCTCAATGAACCCCTGTGCACAGATATTGTTTCCCCTGCAGTTTGTGGAAATGAACT  
 Css75 CAATGCATTCTCAATGAACCCCTGTGCACAGATATTGTTTCCCCTGCAGTTTGTGGAAATGAACT

↑ Spacer/Disintegrin start (Hite et al., 1994)

1129 1147

Css28 TTTGGAGGCGGGAGAAGAA  
 Css31 TTTGGAGGCGGGAGAAGAA  
 Css36 TTTGGAGGCGGGAGAAGAA  
 Css61 TTTGGAGGCGGGAGAAGAA

|       |                     |
|-------|---------------------|
| Css62 | TTTGGAGGCGGGAGAAGAA |
| Css64 | TTTGGAGGCGGGAGAAGAA |
| Css65 | TTTGGAGGCGGGAGAAGAA |
| Css66 | TTTGGAGGCGGGAGAAGAA |
| Css67 | TTTGGAGGCGGGAGAAGAA |
| Css68 | TTTGGAGGCGGGAGAAGAA |
| Css69 | TTTGGAGGCGGGAGAAGAA |
| Css71 | TTTGGAGGCGGGAGAAGAA |
| Css74 | TTTGGAGGCGGGAGAAGAA |
| Css75 | TTTGGAGGCGGGAGAAGAA |
